# MLL1, a H3K4 methyltransferase, regulates the TNF $\alpha$ -stimulated activation of genes downstream of NF- $\kappa$ B

Xiang Wang<sup>1,2,\*</sup>, Kun Zhu<sup>1,2,\*</sup>, Shangze Li<sup>1,2</sup>, Yifang Liao<sup>3</sup>, Runlei Du<sup>1,2</sup>, Xiaodong Zhang<sup>1,2</sup>, Hong-Bing Shu<sup>1</sup>, An-Yuan Guo<sup>3</sup>, Lianyun Li<sup>1,2,‡</sup> and Min Wu<sup>1,2,‡</sup>

<sup>1</sup>College of Life Sciences, Wuhan University, Wuhan, Hubei430072 China

<sup>2</sup>Hubei Enteropathy Key Laboratory, Wuhan, Hubei, 430072 China

<sup>3</sup>Hubei Bioinformatics & Molecular Imaging Key Laboratory, College of Life Science and Technology, Huazhong University of Science and Technology, Wuhan, 430074 China

\*These authors contributed equally to this work

‡Authors for correspondence ([wumin@whu.edu.cn](mailto:wumin@whu.edu.cn); [lilianyun@whu.edu.cn](mailto:lilianyun@whu.edu.cn))

Accepted 29 April 2012

Journal of Cell Science 125, 4058–4066

© 2012. Published by The Company of Biologists Ltd

doi: 10.1242/jcs.103531

## Summary

Genes of the mixed lineage leukemia (MLL) family regulate transcription by methylating histone H3K4. Six members of the MLL family exist in humans, including *SETD1A*, *SETD1B* and *MLL1–MLL4*. Each of them plays non-redundant roles in development and disease genesis. *MLL1* regulates the cell cycle and the oscillation of circadian gene expression. Its fusion proteins are involved in leukemogenesis. Here, we studied the role of MLL1 in innate immunity and found it selectively regulates the activation of genes downstream of NF- $\kappa$ B mediated by tumor necrosis factor (TNF $\alpha$ ) and lipopolysaccharide (LPS). Real-time PCR and genome-wide gene expression profile analysis proved that the deficiency of *MLL1* reduced the expression of a group of genes downstream of nuclear factor  $\kappa$ B (NF- $\kappa$ B). However, the activation of NF- $\kappa$ B itself was not affected. The MLL1 complex is found both in the nucleus and cytoplasm and is associated with NF- $\kappa$ B. CHIP assays proved that the translocation of MLL1 to chromatin was dependent on NF- $\kappa$ B. Our results suggest that MLL1 is recruited to its target genes by activated NF- $\kappa$ B and regulates their transcription.

**Key words:** MLL1, MLL, Histone methylation, Transcription regulation, NF- $\kappa$ B signaling pathway

## Introduction

*MLL1* (mixed lineage leukemia 1) was first identified from leukemia patients ~20 years ago (Krivtsov and Armstrong, 2007; Ziemins-van der Poel et al., 1991). The N-terminal of *MLL1* is able to fuse with other partners upon chromatin translocation and this induces leukemogenesis by regulating the expression of HOX genes (Krivtsov and Armstrong, 2007; Mohan et al., 2010). The biochemical function of MLL1 was not clear until Set1, its homolog in *Saccharomyces cerevisiae*, was defined as an H3K4 methyltransferase (Miller et al., 2001). Six homologs for Set1 exist in human, *SETD1A* (SET domain containing 1A), *SETD1B* (SET domain containing 1B) and *MLL1–MLL4* (Wu et al., 2008). Each of these six proteins contains a conserved SET domain, the catalytic domain for methylating histone H3K4, and its full function requires the formation of a complicated complex. Each enzyme complex contains four common units, including RBBP5 (retinoblastoma binding protein 5), WDR5 (WD repeat domain 5), ASH2L (ash2-like) and DPY30 (dpy-30 homolog) (Cho et al., 2007; Lee and Skalnik, 2005; Lee and Skalnik, 2008; Lee et al., 2007; Wu et al., 2008; Yokoyama et al., 2004). The six complexes might have different biological functions because each one also contains specific subunits (Eissenberg and Shilatifard, 2010). This idea is also supported by studies within animal models. Deletion of either *Mll1* or *Mll2* in mice is embryonic lethal, suggesting that both *Mll1* and *Mll2* have important and non-redundant roles in embryo development (Glaser et al., 2006; Yu et al., 1995).

Data from a ChIP-Chip assay has indicated that MLL1 might be a common transcription factor and essential for gene transcription (Guenther et al., 2005). However, other groups have come to different conclusions because MEFs (mouse embryonic fibroblasts) derived from *Mll1*<sup>-/-</sup> mice grow normally. Moreover, the global mRNA expression patterns in the *Mll1*<sup>-/-</sup> MEF cell also did not change much compared with that of the wild type. MLL1 has been shown to regulate only the expression of a subset of active genes in vivo (Milne et al., 2005). Genome wide ChIP-Chip assays of H3K4 trimethylation indicate that only ~5% of the actively transcribed genes have reduced methylation in *Mll1*<sup>-/-</sup> cells in comparison with the wild type (Wang et al., 2009). A similar result was also observed for a global gene expression profile (Wang et al., 2009). The function of MLL1 on the majority of gene promoters is still unknown.

How MLL1 fusion proteins regulate leukemogenesis has been heavily investigated in the past 20 years (Krivtsov and Armstrong, 2007; Mohan et al., 2010). In contrast, very few studies have explored other physiological functions of MLL1. Although methylated H3K4 seems to be related to global gene transcription (Barski et al., 2007; Eissenberg and Shilatifard, 2010; Ruthenburg et al., 2007; Shilatifard, 2008; Sims and Reinberg, 2006), deficiency of the methylation does not always lead to gene silencing. Therefore, how H3K4 methylation regulates transcription still remains puzzling. Moreover, multiple H3K4 methyltransferases exist in mammals and their functions are not redundant. Their

functions in development and other physiological events remain to be elucidated.

Recently, an MLL1 complex has been found to associate with condensed chromatin during M phase, on genes that are usually expressed preferentially in interphase (Blobel et al., 2009). It is hypothesized that MLL1 binds to these genes and regulates their methylation and transcription immediately after exit from M phase. Another report has recently suggested that MLL1 is associated with the CLOCK (circadian locomotor output cycles kaput)–BMAL1 (brain and muscle ARNT-like 1) complex and is recruited to circadian promoters (Katada and Sassone-Corsi, 2010).

The MLL1 complex is usually considered to mainly function inside the nucleus; nearly all previous studies have shown that MLL1 functions on the chromatin, and the first complex to be purified was also done from nuclear extract (Yokoyama et al., 2004). However, one study has reported that WDR5, one important subunit of the MLL1 complex, is associated with the VISA-associated complex and regulates the virus-triggered induction of type I interferons (IFNs) and the innate immune response in the cytoplasm (Wang et al., 2010). The discovery raised the possibility that the MLL1 complex might also function in the cytoplasm and methylate substrates other than H3. The NF- $\kappa$ B pathway is one of the key pathways involved in innate immunity and other physiological responses (Baud and Karin, 2009; Ghosh and Hayden, 2008; Smale, 2010; Spehlmann and Eckmann, 2009; Sun and Karin, 2008). This pathway can be activated by many signals, including TNF $\alpha$  (tumor necrosis factor), LPS (lipopolysaccharide), TLRs (TOLL-like receptors) and so on. Usually different signals will trigger different profiles of gene transcription (Ghosh and Hayden, 2008; Smale, 2010). How a single transcription factor achieves selective gene transcription has been an unsolved question for a long time. Epigenetic markers and molecules have emerged as key players in gene transcription (Campos and Reinberg, 2009; Chi et al., 2010; Eissenberg and Shilatifard, 2010; Smith et al., 2011; Sukanuma and Workman, 2011; Trojer and Reinberg, 2006). MLL1 and MLL2 have been shown to be recruited by the p52 subunit of NF- $\kappa$ B to the promoter of *MMP9* (matrix metalloproteinase 9) in a T cell lymphoma cell line (Robert et al., 2009). It is therefore possible MLL1 is involved in the regulation of the NF- $\kappa$ B signaling pathway.

We investigated the relationship between MLL1 and the TNF $\alpha$ - and LPS-stimulated NF- $\kappa$ B signaling pathway in this study. Our data suggest that MLL1 selectively regulates the activation of genes downstream of NF- $\kappa$ B.

## Results

### MLL1 deficiency leads to a reduction of the activation of a subset of genes downstream of NF- $\kappa$ B

We started to investigate the role of Mll1 in NF- $\kappa$ B signaling pathway by checking the altered expression of NF- $\kappa$ B downstream genes in Mll1-deficient cells. Wild-type and *Mll1*<sup>-/-</sup> cells were treated with TNF $\alpha$  (10 ng/ml), and harvested 0.5 hours or 4 hours after treatment. Over thirty known NF- $\kappa$ B target genes were examined. The basal mRNA level of most of the genes did not show a significant change in the *Mll1*<sup>-/-</sup> cells (supplementary material Fig. S1). Only very few genes, such as *Ptges*, showed reduction of the mRNA level upon *Mll1* deficiency (supplementary material Fig. S1). Genes activated significantly by TNF $\alpha$  in MEFs were used for further

analysis. We found that the activation of many genes was greatly impaired in the *Mll1*<sup>-/-</sup> cells, such as the *Nfkbia* (the gene encoding I $\kappa$ B $\alpha$ ), *Tnfaip3* (also known as A20), *Irf1*, *Cxcl1*, *Ccl2* (also known as Mcp1) and *Trafl* genes (Fig. 1A). However, we also found a group of the NF- $\kappa$ B target genes whose mRNA level was not reduced in *Mll1*<sup>-/-</sup> cells, such as *Sod2* and *Tnfp1* (Fig. 1B). In order to further confirm that the reduction of gene expression was the consequence of *Mll1* deficiency, the above experiments were repeated using a cell line in which a Flag-tagged *Mll1* had been integrated into the genome of *Mll1*<sup>-/-</sup> cell (designated F-Mll1). We found that the activation levels of *Nfkbia* (I $\kappa$ B $\alpha$ ) (Fig. 1C), *Tnfaip3* (A20) and *Irf1* were restored to a normal level in the F-Mll1 cell line. The increase of Mll1 amount did not affect the expression of *Sod2*, as judged by comparing the expression in *Mll1*<sup>-/-</sup> and F-Mll1 cells (Fig. 1C). These data suggest that MLL1 is involved in the transcriptional activation of NF- $\kappa$ B target genes and selectively regulates a subset of downstream genes in MEFs. In the following studies, *Nfkbia* (I $\kappa$ B $\alpha$ ) and *Sod2* were used as the representative genes for understanding the molecular mechanisms of this process.

We further tested whether Mll1 also regulates gene expression downstream of NF- $\kappa$ B under other stimuli or in other cell lines. LPS was used to stimulate the above MEF cell lines. The expression of *Nfkbia* (I $\kappa$ B $\alpha$ ) and *Sod2* was similar to that upon TNF $\alpha$  treatment (Fig. 1D). HCT116, a human colon cancer cell line, and HL7702, an immortalized human liver cell line, were used to verify the effect of *Mll1* on activation of genes downstream of NF- $\kappa$ B. siRNA against *Mll1* was transfected into the above cell lines and the mRNA levels of genes were assayed. Data suggest Mll1 also regulates NF- $\kappa$ B target genes in the above cell lines (supplementary material Figs S2, S3). In order to verify whether the protein levels of these genes were also impaired in the MLL1-deficient cells, an ELISA experiment was performed for IL6 in the HL7702 cell line. Similar to the results with mRNA (Fig. 1E, top right), the amount of secreted IL6 in the medium was greatly reduced after *Mll1* knockdown (Fig. 1E, bottom). Thus, we conclude that MLL1 is involved in the activation of downstream genes of NF- $\kappa$ B mediated by TNF $\alpha$  and LPS in multiple cell lines.

### A genome-wide gene expression profile proves Mll1 regulates the NF- $\kappa$ B signaling pathway

In order to identify the genes downstream of NF- $\kappa$ B that are regulated by Mll1 on a genome-wide scale, a gene expression profile was analyzed by next-generation sequencing. *Mll1*<sup>+/+</sup> and *Mll1*<sup>-/-</sup> MEF cells were treated with TNF $\alpha$  for 4 hours, and then isolated mRNA was reverse transcribed and subjected to next-generation sequencing. The raw data have been uploaded to the GEO database (<http://www.ncbi.nlm.nih.gov/geo/query/acc.cgi?acc=GSE36567>). The identified genes with different expression levels in each cell line are listed in supplementary material Tables S2 and S3 ( $P < 0.01$ ). The numbers of genes upregulated by TNF $\alpha$  were calculated (Fig. 2A). The numbers of genes upregulated more than 1.5-fold were very close in wild-type and knockout cells. However, for genes upregulated more than 2-, 3- or 4-fold, the numbers in the *Mll1*<sup>-/-</sup> cells were much less than those in *Mll1*<sup>+/+</sup> cells. This suggests that some of the genes are stimulated to a lesser extent by TNF $\alpha$  in the absence of *Mll1*.

Genes that were upregulated more than 2-fold in *Mll1*<sup>+/+</sup> cells were picked for clustering analysis in all the four samples ( $P < 0.01$  in all four samples) (Fig. 2B). The genes were clearly

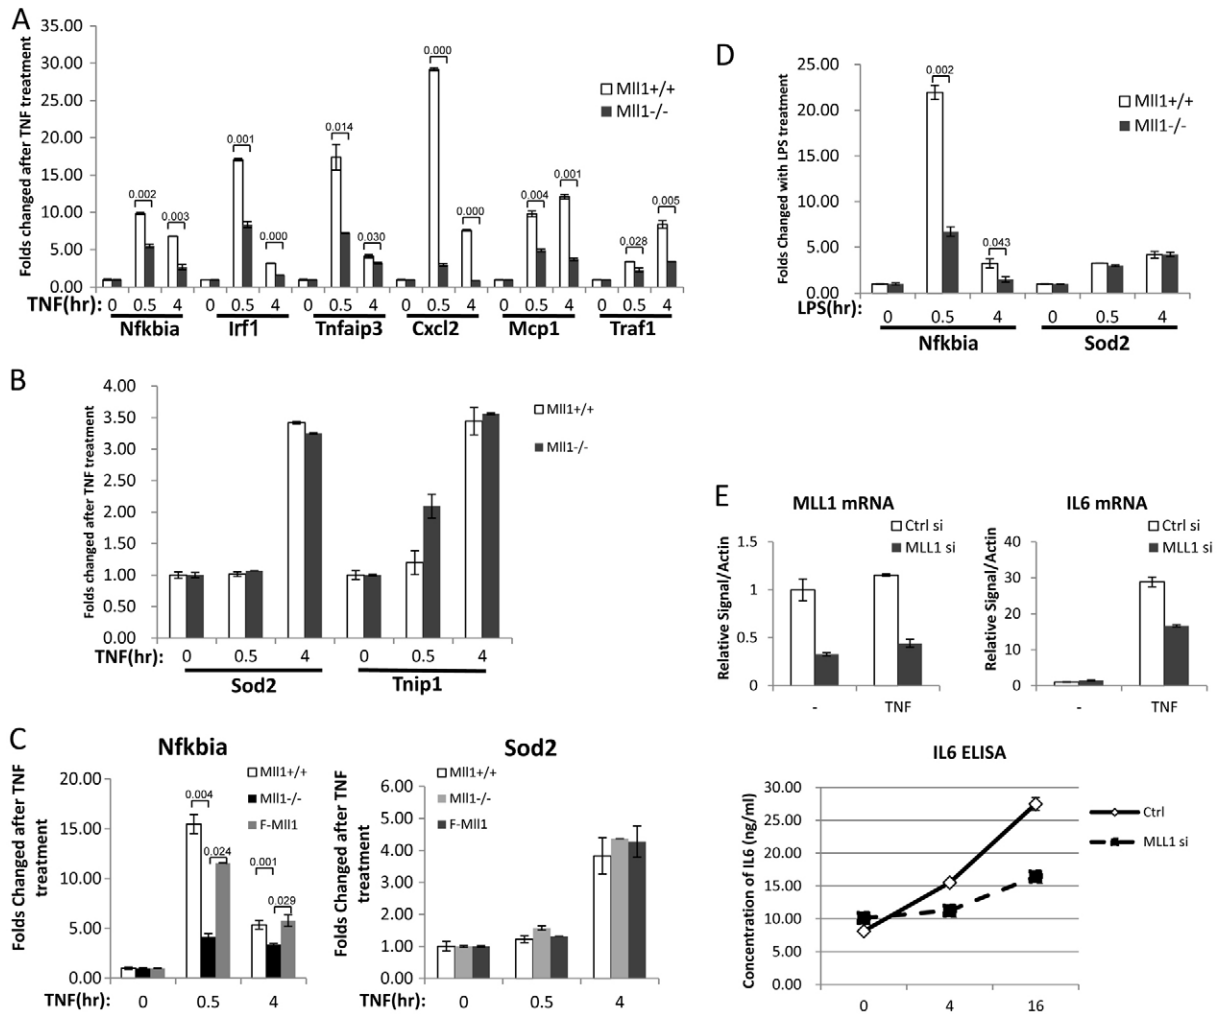

**Fig. 1. MLL1 regulates the expression of genes downstream of NF- $\kappa$ B.** (A) Cells were treated with TNF $\alpha$  and the levels of mRNA for various genes were assayed. The activation of genes downstream of NF- $\kappa$ B [*Nfkbia* ( $\text{I}\kappa\text{B}\alpha$ ), *Irf1*, *Tnfaip3* (A20), *Cxcl2*, *Mcp1* and *Traf1*] was reduced in *Mll1*<sup>-/-</sup> cells. (B) The activation of *Sod2* and *Tnfp1* was not reduced in *Mll1*<sup>-/-</sup> cells. (C) The activation of *Nfkbia* was restored in the F-*Mll1* cell line. (D) LPS was used to activate the NF- $\kappa$ B signaling pathway. The activation of the  $\text{I}\kappa\text{B}\alpha$ -encoding gene was also impaired in *Mll1*<sup>-/-</sup> cells, but not that of *Sod2*. (E) *Mll1* was knocked down by siRNA in HL-7702 cells (top left). Levels of IL6 in the medium were assayed by ELISA. MLL1 deficiency caused the reduction of mRNA (top right) and protein of IL6 (bottom). The *P* value of significantly different results is indicated above the corresponding columns.

categorized into two groups, *Mll1*-dependent and *Mll1*-independent genes (Fig. 2B). These data correlated very well with our studies using real-time PCR and further proved that MLL1 selectively regulates TNF $\alpha$ -induced genes downstream of NF- $\kappa$ B on a genome-wide scale. We searched the two groups of genes using the Gene Ontology database. Among the 61 *Mll1*-dependent genes, 27 genes (~45%) are related to the inflammation and immune response. For the *Mll1*-independent genes, 11 out of 37 genes (29%) are related to the inflammation and immune response. We conclude that *Mll1*-dependent genes seem to be enriched in those related with inflammation and immune response.

#### MLL1 depletion does not affect the activation of NF- $\kappa$ B by TNF $\alpha$

In order to further understanding of the role of MLL1 in the activation of the NF- $\kappa$ B signaling pathway, we checked whether activation of the pathway was impaired in *Mll1*<sup>-/-</sup> cell lines by

using a luciferase reporter assay. *Mll1*<sup>+/+</sup> and *Mll1*<sup>-/-</sup> cell lines were treated with TNF $\alpha$  and the luciferase activity was assayed 12 hours later. The result showed that the NF- $\kappa$ B pathway was activated in *Mll1*<sup>-/-</sup> cells to a similar level to that in wild-type cells (Fig. 3A). We also studied the translocation of the p50 subunit of NF- $\kappa$ B into the nucleus by immunofluorescent staining and CHIP assays in the *Mll1*<sup>-/-</sup> cell. Immunofluorescent staining indicated that p50 was still translocated into nucleus after TNF $\alpha$  treatment in the absence of *Mll1* (supplementary material Fig. S4). The results of CHIP assay showed that the ability of p50 to bind to DNA had no obvious difference between *Mll1*<sup>+/+</sup> and *Mll1*<sup>-/-</sup> cells (Fig. 3B). Taken together, these data suggest that MLL1 deficiency does not affect the activation of NF- $\kappa$ B by TNF $\alpha$ .

#### MLL1 depletion affects the oscillation of $\text{I}\kappa\text{B}\alpha$ upon TNF $\alpha$ treatment

To study the effect of MLL1 on the NF- $\kappa$ B signaling pathway, we analyzed the degradation of  $\text{I}\kappa\text{B}\alpha$ , which is one of the

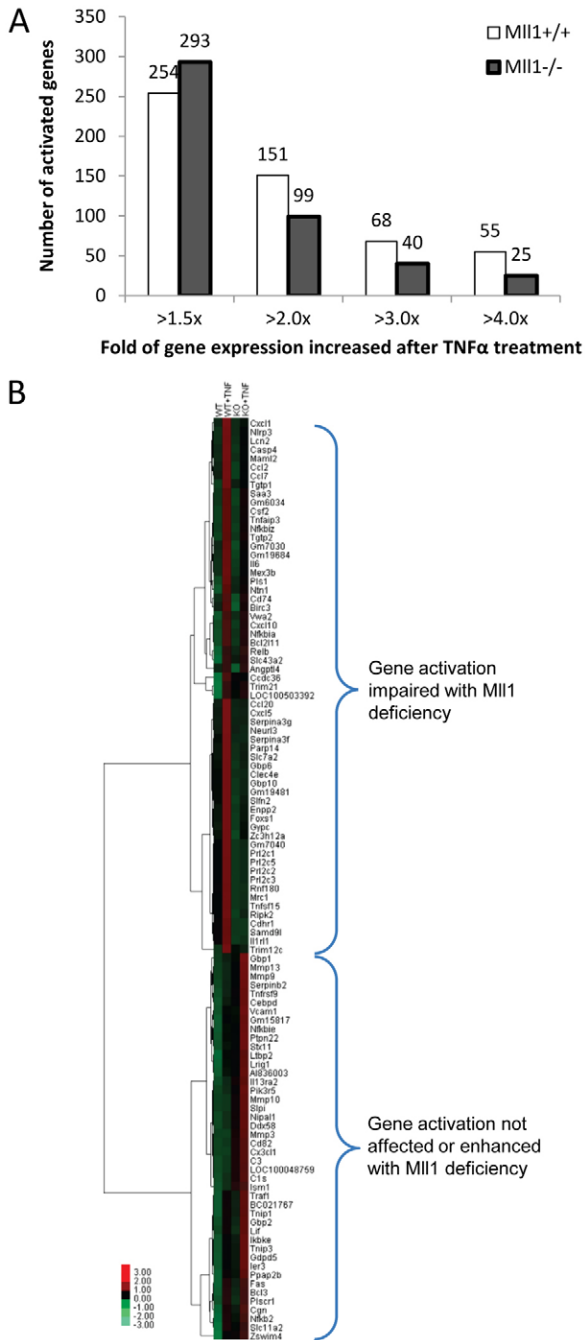

**Fig. 2. The expression profiles of genes downstream of NF-κB regulated by MLL1, as analyzed by RNA sequencing.** *Mll1*<sup>+/+</sup> and *Mll1*<sup>-/-</sup> cells were treated with TNFα and extracted RNA were subjected to a gene expression profile analysis. (A) The number of genes upregulated by the indicated amount in both cell lines was calculated. The number of genes upregulated by >1.5-fold was not substantially different in the two cell lines. The number of genes upregulated genes by a greater amount (>2-, 3- and 4-fold) was less in the *Mll1*<sup>-/-</sup> cell, which suggests that the level of activation of some genes was reduced in the absence of MLL1. (B) All the genes activated by TNFα in the *Mll1*<sup>+/+</sup> cell (i.e. with a >2-fold increase at *P*<0.01 in all four samples) were subjected to gene clustering. A total of 61 of these 97 genes showed an *Mll1*-dependent regulation.

hallmarks of NF-κB activation. In *Mll1*<sup>-/-</sup> cells, the protein level of IκBα rapidly decreased 30 minutes after TNFα treatment (Fig. 3C). However, at 4 hours, its protein level did not recover to

the same extent as that seen in wild-type cells. Instead, the protein levels of IκBα at 0.5, 4 and 12 hours were almost the same (Fig. 3C). The level of *Nfkbia* mRNA (i.e. that encoding IκBα), and the bound p65 on the *Nfkbia* promoter were also analyzed at the above time points (supplementary material Figs S5, S6). The oscillation of IκBα protein levels is a typical characteristic of prolonged NF-κB activation and is known to be the consequence of degradation and synthesis of IκBα at the same time. The levels of IκBα expression in *Mll1*<sup>-/-</sup> cells is consistent with the above data, and is due to the impaired mRNA synthesis of *Nfkbia* (supplementary material Fig. S5). However, the amount of p65 on the *Nfkbia* promoter was not different between the two cell lines (supplementary material Fig. S6), which is consistent with the above data.

**WDR5 and RBBP5 are present in both the nucleus and cytoplasm**

The MLL1 complex exerts its function on the chromatin and until recently no study had reported whether it is present outside the nucleus. Wang et al. reported recently that WDR5 localizes to both the cytosol and nucleus (Wang et al., 2010). We studied the localization of endogenous RBBP5 and WDR5 by western blotting and immunofluorescent staining. Wild-type MEF cells were separated into three fractions, those from the cytosol, soluble and insoluble fraction of nucleus. The results of western blotting showed that RBBP5 and WDR5 are present both in cytosol and nucleus (Fig. 4A). Histone H3 was used as the control for the nuclear fraction. p65, the transactivation subunit of NF-κB, resided in the cytoplasm without upstream signals (Fig. 4A). The results of immunofluorescent staining showed that the majority of WDR5 and RBBP5 are localized inside the nuclear. However, we also observed substantial amount of the above proteins in the cytosol (Fig. 4B). These data suggested that WDR5 and RBBP5, two subunits of the MLL1 complex, are localized both in cytosol and nuclear.

**Generation of a cell line expressing triple-Flag-tagged MLL1**

MLL1 is usually expressed at a very low level in many cell lines. In order to further study the localization of Mll1, we generated a knock-in cell line derived from a colon cancer cell line, HCT116 (Fig. 4C). A triple Flag tag and streptavidin-binding peptide (SBP) were knocked into the C-terminal of the *MLL1* gene in one of the chromosome copies. Because the SET domain, which is responsible for the catalytic activity of MLL1, is located at the very C-terminus of the MLL1 protein, the addition of the tags meant the resulting protein (designated 3F-MLL1) was unable to methylate histone H3 (data not shown). We did not get homozygous clones, which suggests that the complete loss of MLL1 catalytic activity causes cell death. However, the heterozygous clones were still useful.

**MLL1 is associated with RBBP5 in cytoplasm**

Next, we separated nuclear and cytoplasm fractions of the 3F-MLL1-expressing cells and performed immunoprecipitation with anti-Flag antibody for each fraction. We detected 3F-MLL1 in both fractions (Fig. 4D). Interestingly, this result also indicates that cytoplasmic MLL1 is associated with RBBP5 (Fig. 4D), which raises the possibility that the MLL1 complex might be intact and catalytically functional outside of nucleus.

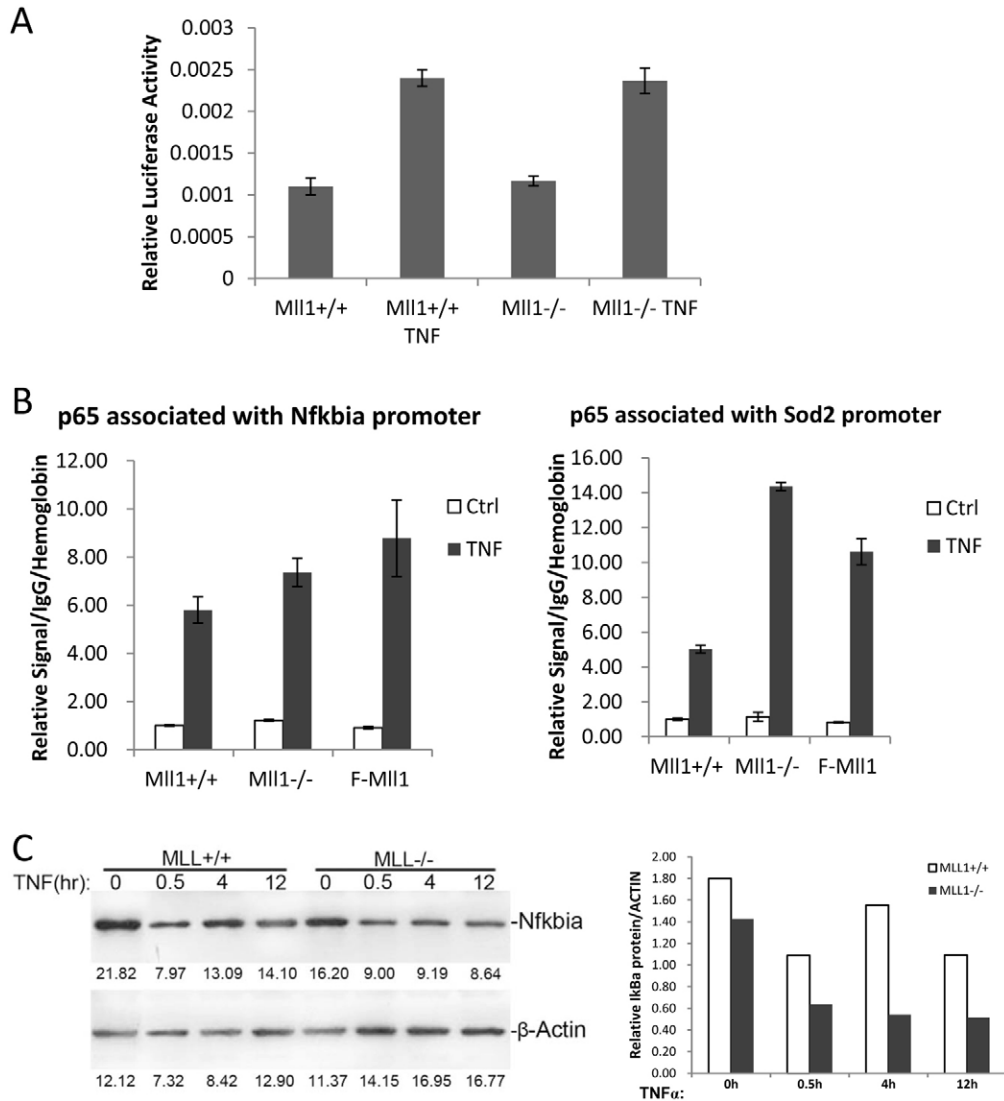

**Fig. 3. MLL1 deficiency affected the oscillation of the level of IκBα protein.** (A) In wild-type and *Mll1*<sup>-/-</sup> cells, TNFα activates NF-κB pathways to the same level in a luciferase reporter assay. (B) A ChIP assay of p65 shows that the recruitment of p65 to the *Nfkbia* (IκBα) (left) and *Sod2* (right) promoters was not reduced in the *Mll1*<sup>-/-</sup> cell, compared with wild-type and Flag-MLL1-expressing MEFs. (C) The oscillation of IκBα was affected in *Mll1*<sup>-/-</sup> cell. With prolonged TNFα treatment in the wild-type cell, levels of IκBα had decreased by 30 minutes, but had recovered at 4 hours and had decreased again at 12 hours. In *Mll1*<sup>-/-</sup> cell, the level of IκBα was very similar at the different time points. The right-hand panel shows a quantification of western blot.

### The cytoplasmic MLL1 complex translocates into nucleus after TNFα treatment

To investigate the role of the MLL1 complex in TNFα-mediated NF-κB signaling, we first studied the localization of MLL1 and RBBP5 upon TNFα treatment. The 3F-MLL1-expressing HCT116 cell line was treated with 10 ng/ml TNFα for 30 minutes before being fractionated to give cytosol and nuclear extracts. The results of immune blotting showed that p65 was translocated into the nuclei after TNFα treatment as expected. The protein levels of 3F-MLL1 in the cytosol also decreased upon TNFα treatment. MLL1 might be translocated from cytosol into nucleus (Fig. 4E). We did not see a significant increase in 3F-MLL1 in the nuclear fraction, which might be owing to the large amount of MLL1 protein in the nucleus before TNFα treatment (Fig. 4E). We also tried immunofluorescent staining experiment with anti-Flag antibody, but we could not see MLL1 signal owing to the low expression level. The localization of RBBP5 was also examined by western blotting and immunofluorescent staining. The pattern was similar to that in MEF cell (Fig. 4A) and only a very tiny change was observed in the amount of this protein that was present in both the cytosol and nuclear fractions. Since RBBP5 is a common subunit of all six H3K4 methyltransferases, a change in the distribution of

the MLL1 complex might not affect the distribution of RBBP5 greatly in the cell.

### MLL1 is associated with p65

The above studies suggest that there is a correlation between MLL1 localization and TNFα-stimulated signaling transduction. Thus, we further explored the interaction between p65 and MLL1 complex in immunoprecipitation studies. Anti-Flag antibody pulled down 3F-MLL1, as well as p65, in the cytoplasm fraction, which suggests that MLL1 is associated with NF-κB in the cytoplasm (Fig. 4E). After TNFα treatment, MLL1 disappeared from the cytoplasm but a large amount of p65 still remained. However, anti-Flag antibody did not bring down detectable p65 protein, which serves as good control (Fig. 4E). We did not observe obvious interaction in the nuclear fraction. This might be because the high concentration of NaCl (420 mM) used in the fractionation procedure broke the interaction.

### MLL1 binds to the promoters of NF-κB target genes before activation

Because MLL1 regulates the expression of NF-κB target genes but does not affect the activation of NF-κB, it might function

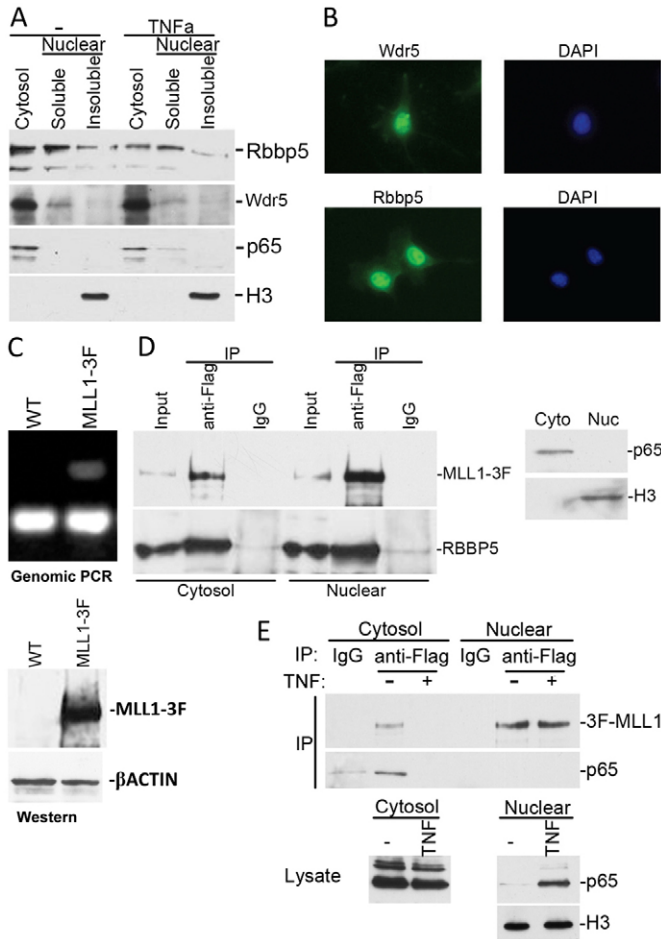

**Fig. 4. MLL1 translocates into the nucleus upon TNF $\alpha$  treatment.** (A) MEF cell was fractionated into cytoplasmic, and soluble and insoluble nuclear fractions. RBBP5 and WDR5 were found in both the cytoplasm and nucleus. (B) Immunofluorescent staining shows that WDR5 and RBBP5 in MEF cell are localized in both the cytoplasm and nucleus. (C) PCR of genomic DNA (top) and anti-Flag western blotting (bottom) of the 3F-MLL1-expressing HCT116 cell. (D) After fractionation, the cytoplasm and nuclear fractions of the 3F-MLL1-expressing HCT116 cell were used for anti-Flag immunoprecipitation (IP). 3F-MLL1 brought down RBBP5 in both fractions. Western blots of p65 and H3 are shown as the control for fractionation. (E) 3F-MLL1 in the cytoplasm disappeared after TNF $\alpha$  treatment. Immunoprecipitation of 3F-MLL1 brought down p65 in the cytoplasm fraction. Western blots of H3 and p65 are shown as the loading control.

after NF-κB binds to the chromatin. In addition, it is possible that MLL1 functions differently on the promoters of *Nfkbia* (encoding IκB $\alpha$ ) and *Sod2*. We first studied whether MLL1 binds to the promoters of *Nfkbia* and *Sod2* in MEF cell lines by using a CHIP assay. The results showed that MLL1 binds to both of the promoters before treatment (Fig. 5A). Although the signal on the *Sod2* promoter was quite low, we observed it above background in most of the experiments. This result is consistent with the genome-wide chromatin association study of MLL1 reported previously (Guenther et al., 2005). The trimethylation of H3K4 on the promoters of multiple genes were also studied in wild-type and *Mll1*<sup>-/-</sup> cells. All of the promoters were had H3K4 trimethylation, which did not show a significant reduction in *Mll1*<sup>-/-</sup> cells compared that of with the wild type (Fig. 5B). This

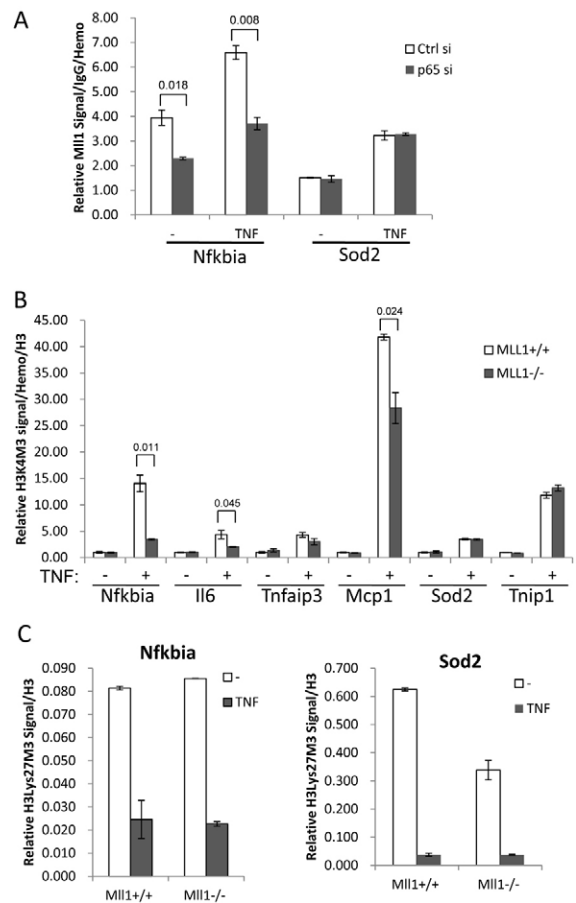

**Fig. 5. MLL1 regulates the increased H3K4 trimethylation on the *Nfkbia* (IκB $\alpha$ ) promoter induced by TNF $\alpha$ .** (A) p65 was knocked down in the F-Mll1 MEF cell line by siRNA. A ChIP assay was performed to study the amount of F-Mll1 on chromatin. MLL1 bound to the promoters of *Nfkbia* and *Sod2* in the untreated cell. After knocking down p65, the bound F-Mll1 on the *Nfkbia* promoter was reduced in comparison with that in the control. (B) A ChIP assay indicated that, in wild-type cells, TNF $\alpha$  induced the increase of H3K4 trimethylation on the promoters of *Mll1*-dependent genes [*Nfkbia* (IκB $\alpha$ ), *Il6*, *Tnfaip3* (A20) and *Mcp1*]. In the *Mll1*<sup>-/-</sup> cell, the basal level of H3K4 trimethylation was the same, but the induction of methylation was impaired. The H3K4 trimethylation on Mll1-independent genes (*Sod2* and *TNIP1*) promoter was still elevated in the absence of MLL1. (C) H3K27 trimethylation of *Nfkbia* and *Sod2* promoters decreased with TNF $\alpha$  treatment in wild type and *Mll1*<sup>-/-</sup> MEF cells. The *P* value of significantly different results is indicated above the corresponding columns.

is also consistent with our previous report (Wang et al., 2009). Considering that the mRNA of the two genes did not reduce upon *Mll1* deficiency, it seems that MLL1 just pre-binds the promoters and has no function without stimulation.

**p65 is indispensable for MLL1 recruitment to NF-κB target genes**

Because MLL1 pre-binds the promoters of genes downstream of NF-κB, we questioned whether the cytoplasmic MLL1 is still required for the gene activation. We performed an MLL1 CHIP assay to study MLL1 occupancy on promoters after TNF $\alpha$  treatment. MEF cells were treated with TNF $\alpha$  and cells were harvested 30 minutes later. The result showed that the amount of MLL1 bound to both the *Nfkbia* (encoding IκB $\alpha$ ) and *Sod2*

promoters increased substantially (Fig. 5A). When p65 was knocked down by siRNA, the amount of MLL1 bound to the *Nfkbia* promoter substantially reduced (Fig. 5A). However, there was no obvious difference in the amount of MLL1 on the *Sod2* promoter with or without p65 (Fig. 5A). These results suggest that the translocation of MLL1 to the *Nfkbia* promoter is dependent on p65, but that other factors might mediate MLL1 translocation to the *Sod2* promoter.

### MLL1 mediates the induced H3K4 methylation on the *Nfkbia* promoter

MLL1 is a histone H3K4 methyltransferase and, hence, we analyzed the levels of histone H3K4 trimethylation on promoters. In wild-type cells, the H3K4 trimethylation on the *Nfkbia* promoter increased dramatically upon TNF $\alpha$  treatment. In *Mll1*<sup>-/-</sup> cells, the basal level of H3K4 trimethylation at this promoter was the same as that of wild-type cells, but after TNF $\alpha$  treatment, the increase in H3K4 trimethylation was much less than that of wild-type cells (Fig. 5B). Other MLL1-dependent genes also showed similar results (Fig. 5B). This suggests that MLL1 is not required for the basal level of H3K4 trimethylation on the *Nfkbia* promoter, but is necessary for the trimethylation induced by TNF $\alpha$ . In the case of the *Sod2* and *Tnip1* promoters, the H3K4 trimethylation still increased in *Mll1*<sup>-/-</sup> cells upon TNF $\alpha$  treatment (Fig. 5B), which suggests other enzymes might regulate their H3K4 trimethylation levels.

H3K27 trimethylation was also analyzed on the *Nfkbia* and *Sod2* promoters. When treated with TNF $\alpha$ , the amount of the H3K27 trimethylation reduced dramatically on both promoters, which suggests that MLL1 functions independently of the regulation of H3K27 trimethylation on these sites (Fig. 5C). We also analyzed H3K9 dimethylation on these promoters and no obvious signals were detected with or without TNF $\alpha$ . This suggests that H3K9 dimethylation might not be involved in the regulation of *Nfkbia* and *Sod2* expression.

### The H3K4 methyltransferases synergistically regulate the activation of the NF- $\kappa$ B signaling pathway

Given that the H3K4 trimethylation on the *Sod2* promoter did not change in *Mll1*<sup>-/-</sup> cells, we were aware that there might be other H3K4 methyltransferases involved in the process. The closest homologs of *Mll1* include the five genes *Setd1a*, *Setd1b*, *Mll2* (also called Wbp7), *Mll3* and *Mll4* (also called Alr). It is possible that one or several of these five genes is responsible for the H3K4 trimethylation on *Sod2* promoter. We analyzed the bound RBBP5 and WDR5 proteins on the promoters. RBBP5 and WDR5 are two subunits that are common to all of the six methyltransferase complexes. RBBP5 was recruited to both *Nfkbia* and *Sod2* promoters upon TNF $\alpha$  treatment in wild-type cells. In *Mll1*<sup>-/-</sup> cells, RBBP5 was still recruited to the promoters but the amount was greatly reduced (Fig. 6A). WDR5 behaved very similarly to RBBP5 in the above cell lines (supplementary material Fig. S7). This suggests that some other methyltransferases might also be involved.

### SETD1A and SETD1B regulate the expression of *Nfkbia* and *Sod2*

We investigated the functions of *Mll2*, *Setd1a* and *Setd1b* in NF- $\kappa$ B signaling by using RNA interference. Small interfering RNAs (siRNAs) were transfected into MEFs and, 72 hours after transfection, cells were treated with TNF $\alpha$  before harvesting.

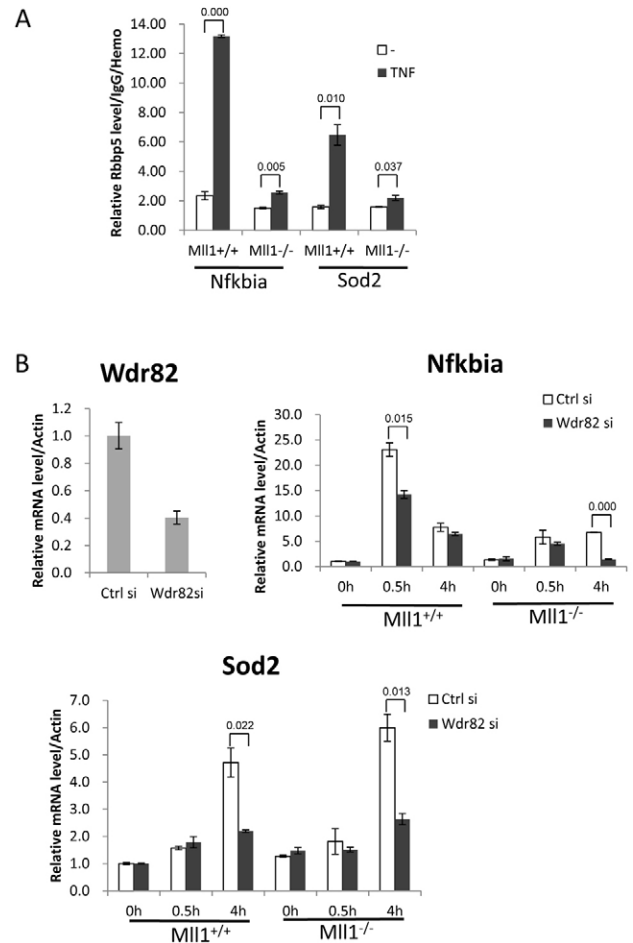

**Fig. 6. SETD1A regulates the activation of genes downstream of NF- $\kappa$ B.**

(A) ChIP results showing that the increased amount of RBBP5 on *Nfkbia* ( $\text{I}\kappa\text{B}\alpha$ ) and *Sod2* promoters was less in *Mll1*<sup>-/-</sup> cell than in wild-type cells. However, this level still increased slightly upon TNF $\alpha$  treatment. (B) *Wdr82* was knocked down by siRNA in wild-type MEFs (top left), which mimics deficiency of *Setd1a*. The basal mRNA levels of *Nfkbia* (top right) and *Sod2* (bottom) were not changed upon *Wdr82* deficiency. However, the elevation of their mRNA after TNF $\alpha$  stimulation was significantly impaired. The *P* value of significantly different results is indicated above the corresponding columns.

*Mll2* deficiency did not affect the basal level or activation of genes downstream of NF- $\kappa$ B (supplementary material Fig. S8). Because *Wdr82* deficiency is known to lead to a reduction of SETD1A protein, knockdown *Wdr82* will mimic the effect of SETD1A and/or SETD1B reduction (Wu et al., 2008). siRNA against *Wdr82* was transfected into MEFs, and similar experiments to those described above were performed. The knockdown of *Wdr82* did not affect the basal level of NF- $\kappa$ B target gene expression; however, both the *Nfkbia* and *Sod2* genes showed impaired expression upon treatment with TNF $\alpha$  (Fig. 6B). By using specific siRNAs against the methyltransferases, we also confirmed that SETD1A and SETD1B were involved in the transcriptional activation of *Nfkbia* and *Sod2* (supplementary material Fig. S9). These data suggest that SETD1A and SETD1B, but not MLL2, also regulate the activation of genes downstream of NF- $\kappa$ B.

### Discussion

The NF- $\kappa$ B signaling pathway can be activated by numerous upstream signals. Usually, the activated gene expression patterns

vary depending on the signals and cell lines, but the mechanisms involved are not clear. Epigenetics has emerged as a key player that is involved in regulation of gene transcription and cell identity. Different combination of chromatin modifications and their enzymes might be crucial in 'tuning' gene expression.

MLL1 and SETD1A are two well-studied histone H3K4 methyltransferases in mammals. The role of MLL1 in leukemogenesis has been extensively studied; however, its functions in other physiological events require more work. Previously, MLL1 has been reported to be associated with CLOCK and to regulate the oscillation of circadian gene expression. We found that MLL1 is associated with p65, the transactivation subunit of NF- $\kappa$ B. When the NF- $\kappa$ B pathway is activated, MLL1 is translocated onto the promoters of NF- $\kappa$ B target genes in a p65-dependent manner. Moreover, MLL1 deficiency also causes the change in the pattern of I $\kappa$ B $\alpha$  oscillation. Interestingly, MLL1 only regulates a subgroup of genes downstream of NF- $\kappa$ B. SETD1A and SETD1B also seem to be important in the regulation of gene transcription. These methyltransferases might act synergistically in gene regulation and it is possible that all the six members behave in a similar manner. The different combination of H3K4 methyltransferases might be another regulatory step in selective transcriptional regulation.

Surprisingly, none of the H3K4 methyltransferases tested in this study regulated the basal expression of *Nfkb1a* and *Sod2*. Therefore, further experiments are required to determine whether any other H3K4 tri-methyltransferases, such as MLL5, are required for the basal level expression of *Nfkb1a* and *Sod2*. Another possibility is that the regulatory step of H3K4 trimethylation is not necessary for some genes. Set1 is the only H3K4 methyltransferase in *S. cerevisiae*; however, the  $\Delta$ set1 strain is still viable under certain conditions. This means many genes are still transcribed without H3K4 methylation. It is possible that although H3K4 trimethylation is always accompanied with active gene transcription, it is dispensable for some genes under certain circumstances.

Most of the previous studies on MLL1 focused on its role in the nucleus, such as in histone modification and transcriptional regulation. We found that MLL1 exists both in the cytoplasm and nucleus. Moreover, MLL1 is still associated with RBBP5 in the cytoplasm, which suggests that the active catalytic complex might exist in both fractions. Many methyltransferases have been reported to be able to modify multiple subunits. We performed an in vitro histone methyltransferase (HMT) assay with <sup>3</sup>H-labeled S-adenosylmethionine (SAM) and purified proteins. Although we did not detect a catalytic activity of MLL1 against p65, it is still possible that MLL1 might have other substrates, both inside and outside of the nucleus.

Previous studies reported that MLL1 binds to a large number of gene promoters, but that the methylation status and gene expression profile was affected too much by its absence. If this is the case, then why does MLL1 bind to these regions? We found that MLL1 binds to the promoter of *Nfkb1a* and does not affect its expression and methylation status before activation. However, upon activation, the amount of MLL1 on the *Nfkb1a* promoter increased immediately, as did the level of H3K4 trimethylation. The behavior of MLL1 is very much like the poised RNA polymerase II (RNA pol II). It has been reported that RNA pol II is associated with some silenced genes. However, when the transcription program is initiated, the amount of RNA pol II on the promoter increases dramatically and leads to rapid

transcription of the gene. We hypothesized that the poised MLL1 pre-binds chromatin and will methylate H3 immediately upon gene activation, which facilitates a quick response to signal transduction. A previous report categorized TNF $\alpha$ -induced genes into three groups (Zhou et al., 2003). The first group elevates rapidly and decreases fast, such as *Il6* and *Cxcl1*; the second elevates rapidly and has sustained upregulation, such as *Nfkb1a* and *Tnfrsf3* (A20); the third elevates slowly, such as *Sod2*. The rapid elevated genes were all *MLL1*-dependent genes in our experiments, which supports our hypothesis.

## Materials and Methods

### Cell lines and antibodies

MEF wild type, MLL1 knockout and F-MLL1 cell lines were a gift from Jay L. Hess (University of Pennsylvania). HL-7702 cell line was purchased from the Cell Bank of Chinese Science Academy. The antibodies against Flag (Sigma), trimethylated H3K4 (Millipore), trimethylated H3K27 (Millipore), H3 (Abcam), NF- $\kappa$ B p65 (Abcam), WDR5 (Bethyl) and RBBP5 (Bethyl) were purchased from indicated companies. The siRNAs against p65 (5'-GCGACAAGGTGCAGAAAGA-3'), Wdr82 (5'-AGAGAACCUGUACAGUAA-3'), MLL1 (5'-GGACAAGAGTAG-AGAGAGA-3') and MLL2 (5'-AGGAGAAGGAAGGCAAA-3') were synthesized by Genepharma. The PCR primers are available in the supplementary material Table S1.

### Cell fractionation

Cells were harvested and spun down in cold PBS. Approximately 5 volumes of buffer A (10 mM Hepes pH 7.9, 1.5 mM MgCl<sub>2</sub>, 10 mM KCl, 0.5 mM DTT, plus proteinase inhibitors; compared with the volume of the cell pellet) was added to the cells, which were then incubated on ice for 15 minutes. Cells were spun down and the supernatant was discarded. Another 2 volumes of buffer A was added to the pellet and the resuspended cells were homogenized with a homogenizer (Wheaton). The mixture was then centrifuged at 25,000 g and the supernatant was taken as the cytoplasm fraction. The pellet was resuspended in buffer C (20 mM Hepes pH 7.9, 25% glycerol, 1.5 mM MgCl<sub>2</sub>, 0.2 mM EDTA, 0.5 mM DTT, plus proteinase inhibitors) and a solution containing 5 M NaCl was dropped into the suspension followed by immediate homogenization. The final NaCl concentration was 0.42 M. The mixture was incubated on ice for 30 minutes and ultracentrifuged at 40,000 g for 1 hour. The resulting supernatant was taken as the soluble fraction of the nucleus and the pellet was the insoluble fraction of nucleus.

### Immunofluorescent staining

Cells were cultured on coverslips and fixed with frozen methanol after washing twice in PBS. The coverslips were then washed three times with PBS and blocked in PBS with 1% BSA for 10 minutes. The coverslips were hybridized with primary and second antibodies for 1 hour, respectively. Then the coverslips were mounted with prolong anti-fade kit (Invitrogen) and observed using fluorescent microscopy.

### Immunoprecipitation

The cells were harvested and lysed in NP40 lysis buffer (50 mM Tris-HCl pH 7.4, 150 mM NaCl, 0.5% NP40) or high-salt lysis buffer (20 mM Hepes pH 7.4, 10% glycerol, 0.35 M NaCl, 1 mM MgCl<sub>2</sub>, 0.5% Triton X-100, 1 mM DTT) with proteinase inhibitors. The supernatant was then incubated with Protein G beads (GE Healthcare) and the desired antibody at 4°C for 4 hours. The beads were spun down and washed three times with lysis buffer. The final drop of wash buffer was vacuumed out and SDS loading buffer was added to the beads, which were then used for western blotting.

### Luciferase reporter assay

HEK293T cells (approximately  $1 \times 10^5$ ) were seeded on 24-well plates and transfected by calcium phosphate precipitation. The reporter plasmid (pRL-TK or pRL-SV40 *Renilla* luciferase) was added to each transfection to normalize for transfection efficiency. A dual-specific luciferase assay kit (Promega) was used for the luciferase assays. Assays were repeated at least three times. Data shown are means  $\pm$  s.d. for one representative experiment.

### ChIP assay

The ChIP assay was performed as previously described (Wu et al., 2008). Briefly,  $\sim 1 \times 10^7$  cells were fixed with 1% formaldehyde and quenched by glycine. The cells were washed three times with PBS and then harvested in ChIP lysis buffer (50 mM Tris-HCl pH 8.0, 1% SDS, 5 mM EDTA). DNA was sonicated to 400–600 bp before extensive centrifugation. Four volumes of ChIP dilution buffer (20 mM Tris-HCl, pH 8.0, 150 mM NaCl, 2 mM EDTA, 1% Triton X-100) was added to the supernatant. The resulted lysate was then incubated with Protein G beads and antibodies at 4°C overnight. The beads were washed five times, and



DNA was eluted using the Chip elution buffer (0.1 M NaHCO<sub>3</sub>, 1% SDS, 30 µg/ml proteinase K). The elution was incubated at 65°C overnight, and DNA was extracted with a DNA purification kit (Sangon). The purified DNA was assayed by quantitative PCR with Biorad MyIQ. Assays were repeated at least three times. Data shown are means±s.d. for representative experiments.

#### Reverse transcription and quantitative PCR

Cells were scraped down and collected by centrifugation. Total RNA was extracted using an RNA extraction kit (Yuanpinghao) according to the manufacturer's manual. Approximately 1 µg of total RNA was used for reverse transcription with a first-strand cDNA synthesis kit (Toyobo). The amount of mRNA was assayed by quantitative PCR. β-actin was used to normalize the amount of each sample. Assays were repeated at least three times. Data shown are means±s.d. for one representative experiment.

#### ELISA

Experiments were carried out with an IL6 ELISA kit (Boster), according to the manufacturer's procedure. Assays were repeated at least three times. Data shown are means±s.d. for representative experiments.

#### Next generation sequencing and data analysis

The cells were treated with TNFα for 4 hours before collection. Total RNA was extracted and reverse transcribed. Then, the cDNA were analyzed by Sinogenomax CO. The raw reads containing low-quality data were cleaned by removing those contain either a base of N or over half qualities below 20. Then, the resulting clean reads were mapped to the mouse mRNA sequences with TopHat software. The RPKM value, which is the normalized number of reads of each mRNA, was calculated and used as the expression level. Genes expressed differently between every two samples were analyzed by the DESeq R package using a cutoff of  $P < 0.01$ . To study the relationship of the differentially expressed genes, the values of selected genes were submitted for cluster analysis by using Cluster3.0 and the heatmap was presented using Java Treeview.

#### Acknowledgements

We thank J. Hess (University of Pennsylvania) for wild-type, *Mll1*<sup>-/-</sup> and F-Mll1 MEF cell lines, and our colleagues for discussions. Author contributions: Xiang Wang and Kun Zhu performed most of the experiments. Shangze Li, Runlei Du and Xiangdong Zhang made the 3F-MLL1 cell line. Anyuan Guo and Yifang Liao analyzed the data from the next-generation sequencing. Hong-bing Shu provided many reagents and contributed to writing the manuscript. Min Wu and Lianyun Li directed the project, conducted the experiments and wrote the manuscript.

#### Funding

This work was supported by grants from the National Basic Research Program of China (973 Program) [grant numbers 2011CB504206, 2012CB518700]; and the National Natural Science Foundation of China [grant numbers 30971502, 91019013 to M. W., 30971501, 30921001 to L. L.].

Supplementary material available online at

<http://jcs.biologists.org/lookup/suppl/doi:10.1242/jcs.103531/-DC1>

#### References

- Barski, A., Cuddapah, S., Cui, K., Roh, T. Y., Schones, D. E., Wang, Z., Wei, G., Chepelev, I. and Zhao, K. (2007). High-resolution profiling of histone methylations in the human genome. *Cell* **129**, 823-837.
- Baud, V. and Karin, M. (2009). Is NF-κB a good target for cancer therapy? Hopes and pitfalls. *Nat. Rev. Drug Discov.* **8**, 33-40.
- Blobel, G. A., Kadauke, S., Wang, E., Lau, A. W., Zuber, J., Chou, M. M. and Vakoc, C. R. (2009). A reconfigured pattern of MLL occupancy within mitotic chromatin promotes rapid transcriptional reactivation following mitotic exit. *Mol. Cell* **36**, 970-983.
- Campos, E. I. and Reinberg, D. (2009). Histones: annotating chromatin. *Annu. Rev. Genet.* **43**, 559-599.
- Chi, P., Allis, C. D. and Wang, G. G. (2010). Covalent histone modifications—miswritten, misinterpreted and mis-erased in human cancers. *Nat. Rev. Cancer* **10**, 457-469.
- Cho, Y. W., Hong, T., Hong, S., Guo, H., Yu, H., Kim, D., Guszczynski, T., Dressler, G. R., Copeland, T. D., Kalkum, M. et al. (2007). PTIP associates with MLL3- and MLL4-containing histone H3 lysine 4 methyltransferase complex. *J. Biol. Chem.* **282**, 20395-20406.
- Eissenberg, J. C. and Shilatifard, A. (2010). Histone H3 lysine 4 (H3K4) methylation in development and differentiation. *Dev. Biol.* **339**, 240-249.
- Ghosh, S. and Hayden, M. S. (2008). New regulators of NF-κB in inflammation. *Nat. Rev. Immunol.* **8**, 837-848.
- Glaser, S., Schaft, J., Lubitz, S., Vintersten, K., van der Hoeven, F., Tuffeland, K. R., Aasland, R., Anastasiadis, K., Ang, S. L. and Stewart, A. F. (2006). Multiple epigenetic maintenance factors implicated by the loss of Mll2 in mouse development. *Development* **133**, 1423-1432.
- Guenther, M. G., Jenner, R. G., Chevalier, B., Nakamura, T., Croce, C. M., Canaani, E. and Young, R. A. (2005). Global and Hox-specific roles for the MLL1 methyltransferase. *Proc. Natl. Acad. Sci. USA* **102**, 8603-8608.
- Katada, S. and Sassone-Corsi, P. (2010). The histone methyltransferase MLL1 permits the oscillation of circadian gene expression. *Nat. Struct. Mol. Biol.* **17**, 1414-1421.
- Krivtsov, A. V. and Armstrong, S. A. (2007). MLL translocations, histone modifications and leukaemia stem-cell development. *Nat. Rev. Cancer* **7**, 823-833.
- Lee, J. H. and Skalnik, D. G. (2005). CpG-binding protein (CXXC finger protein 1) is a component of the mammalian Set1 histone H3-Lys4 methyltransferase complex, the analogue of the yeast Set1/COMPASS complex. *J. Biol. Chem.* **280**, 41725-41731.
- Lee, J. H. and Skalnik, D. G. (2008). Wdr82 is a C-terminal domain-binding protein that recruits the Set1A Histone H3-Lys4 methyltransferase complex to transcription start sites of transcribed human genes. *Mol. Cell. Biol.* **28**, 609-618.
- Lee, J. H., Tate, C. M., You, J. S. and Skalnik, D. G. (2007). Identification and characterization of the human Set1B histone H3-Lys4 methyltransferase complex. *J. Biol. Chem.* **282**, 13419-13428.
- Miller, T., Krogan, N. J., Dover, J., Erdjument-Bromage, H., Tempst, P., Johnston, M., Greenblatt, J. F. and Shilatifard, A. (2001). COMPASS: a complex of proteins associated with a trithorax-related SET domain protein. *Proc. Natl. Acad. Sci. USA* **98**, 12902-12907.
- Milne, T. A., Dou, Y., Martin, M. E., Brock, H. W., Roeder, R. G. and Hess, J. L. (2005). MLL associates specifically with a subset of transcriptionally active target genes. *Proc. Natl. Acad. Sci. USA* **102**, 14765-14770.
- Mohan, M., Lin, C., Guest, E. and Shilatifard, A. (2010). Licensed to elongate: a molecular mechanism for MLL-based leukaemogenesis. *Nat. Rev. Cancer* **10**, 721-728.
- Robert, I., Aussems, M., Keutgens, A., Zhang, X., Henny, B., Viatour, P., Vanstraelen, G., Merville, M. P., Chapelle, J. P., de Leval, L. et al. (2009). Matrix Metalloproteinase-9 gene induction by a truncated oncogenic NF-κB2 protein involves the recruitment of MLL1 and MLL2 H3K4 histone methyltransferase complexes. *Oncogene* **28**, 1626-1638.
- Ruthenburg, A. J., Allis, C. D. and Wysocka, J. (2007). Methylation of lysine 4 on histone H3: intricacy of writing and reading a single epigenetic mark. *Mol. Cell* **25**, 15-30.
- Shilatifard, A. (2008). Molecular implementation and physiological roles for histone H3 lysine 4 (H3K4) methylation. *Curr. Opin. Cell Biol.* **20**, 341-348.
- Sims, R. J., 3rd and Reinberg, D. (2006). Histone H3 Lys 4 methylation: caught in a bind? *Genes Dev.* **20**, 2779-2786.
- Smale, S. T. (2010). Selective transcription in response to an inflammatory stimulus. *Cell* **140**, 833-844.
- Smith, E., Lin, C. and Shilatifard, A. (2011). The super elongation complex (SEC) and MLL in development and disease. *Genes Dev.* **25**, 661-672.
- Spehlmann, M. E. and Eckmann, L. (2009). Nuclear factor-κB in intestinal protection and destruction. *Curr. Opin. Gastroenterol.* **25**, 92-99.
- Suganuma, T. and Workman, J. L. (2011). Signals and Combinatorial Functions of Histone Modifications. *Annu. Rev. Biochem.* **80**, 473-499.
- Sun, B. and Karin, M. (2008). NF-κB signaling, liver disease and hepatoprotective agents. *Oncogene* **27**, 6228-6244.
- Trojer, P. and Reinberg, D. (2006). Histone lysine demethylases and their impact on epigenetics. *Cell* **125**, 213-217.
- Wang, P., Lin, C., Smith, E. R., Guo, H., Sanderson, B. W., Wu, M., Gogol, M., Alexander, T., Seidel, C., Wiedemann, L. M. et al. (2009). Global analysis of H3K4 methylation defines MLL family member targets and points to a role for MLL1-mediated H3K4 methylation in the regulation of transcriptional initiation by RNA polymerase II. *Mol. Cell. Biol.* **29**, 6074-6085.
- Wang, Y. Y., Liu, L. J., Zhong, B., Liu, T. T., Li, Y., Yang, Y., Ran, Y., Li, S., Tien, P. and Shu, H. B. (2010). WDR5 is essential for assembly of the VISA-associated signaling complex and virus-triggered IRF3 and NF-κB activation. *Proc. Natl. Acad. Sci. USA* **107**, 815-820.
- Wu, M., Wang, P. F., Lee, J. S., Martin-Brown, S., Florens, L., Washburn, M. and Shilatifard, A. (2008). Molecular regulation of H3K4 trimethylation by Wdr82, a component of human Set1/COMPASS. *Mol. Cell. Biol.* **28**, 7337-7344.
- Yokoyama, A., Wang, Z., Wysocka, J., Sanyal, M., Aufiero, D. J., Kitabayashi, I., Herr, W. and Cleary, M. L. (2004). Leukemia proto-oncogene MLL forms a SET1-like histone methyltransferase complex with menin to regulate Hox gene expression. *Mol. Cell. Biol.* **24**, 5639-5649.
- Yu, B. D., Hess, J. L., Horning, S. E., Brown, G. A. and Korsmeyer, S. J. (1995). Altered Hox expression and segmental identity in Mll-mutant mice. *Nature* **378**, 505-508.
- Zhou, A., Scoggin, S., Gaynor, R. B. and Williams, N. S. (2003). Identification of NF-κB-regulated genes induced by TNFα utilizing expression profiling and RNA interference. *Oncogene* **22**, 2054-2064.
- Ziemin-van der Poel, S., McCabe, N. R., Gill, H. J., Espinosa, R., 3rd, Patel, Y., Harden, A., Rubinelli, P., Smith, S. D., LeBeau, M. M., Rowley, J. D. et al. (1991). Identification of a gene, MLL, that spans the breakpoint in 11q23 translocations associated with human leukemias. *Proc. Natl. Acad. Sci. USA* **88**, 10735-10739.
